# Supplementary material for: Banana flour phenolics inhibit trans-epithelial glucose transport from wheat cakes in a coupledin vitrodigestion/Caco-2 cell intestinal model
Source: Royal Society of Chemistry journal article supplement (doi:10.1039/c9fo01679a), 2019-01-01
Supplement: c9fo01679a1.pdf [file c9fo01679a1.pdf]

**Banana flour flavonoids dramatically inhibit transepithelial glucose transport in wheat cakes using an *in vitro* digestion/Caco-2 intestinal model**

Joana Pico, Sydney Corbin, Mario Ferruzzi, Mario M. Martinez

**Supplementary material 1.** Crumb structure of wheat cake (control sample) and banana flour-enriched wheat cakes. From the left to the right, F cake (freeze-dried banana flour), D cake (oven dried banana flour), FE cake (freeze-dried and extruded banana flour), DE cake (oven dried and extruded banana flour) and wheat cake (control).

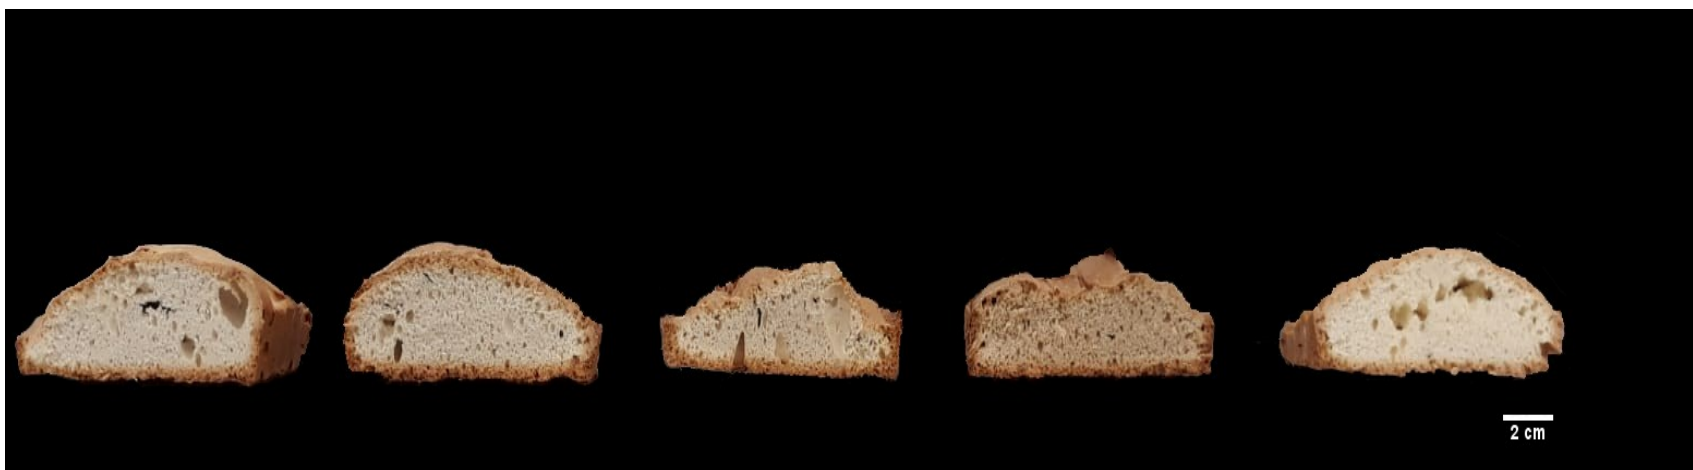

**Supplementary material 2.** Phenolic compounds quantified in banana flours (D, oven-dried; F, freeze-dried; DE, oven-dried and extruded; FE, freeze-dried and extruded), including the m/z ions employed for their quantification. Results are given in mg/100 g. The total content of dietary fiber of banana flours, in g/100 g, as well as the total content of extractable phenolics (EPP) and hydrolyzable phenolics (HPP), in mg/100g, are also included. This data was published in Pico et al. (2019).

|                                     | <b>m/z</b> | <b>D</b>         | <b>F</b>        | <b>DE</b>         | <b>FE</b>         |
|-------------------------------------|------------|------------------|-----------------|-------------------|-------------------|
| <b>Vanillic acid</b>                | 167.00     | nd               | nd              | nd                | nd                |
| <b>Gallic acid</b>                  | 169.20     | 0.008 a ± 0.002  | 0.017 a ± 0.002 | 0.657 b ± 0.056   | 0.669 b ± 0.100   |
| <b>Caffeic acid</b>                 | 179.06     | 0.072 b ± 0.007  | 0.044 a ± 0.007 | 0.095 b ± 0.013   | 0.176 c ± 0.024   |
| <b>Ferulic acid<sup>a</sup></b>     | 193.02     | nd               | nd              | nd                | nd                |
| <b>Chlorogenic acid<sup>a</sup></b> | 353.31     | nd               | nd              | nd                | nd                |
| <b>Epicatechin</b>                  | 289.30     | 1.696 c ± 0.170  | 1.933 d ± 0.127 | 0.346 a ± 0.015   | 1.134 b ± 0.071   |
| <b>Catechin</b>                     | 289.07     | 0.003 a ± 0.001  | nd              | 0.036 c ± 0.002   | 0.017 b ± 0.003   |
| <b>Quercetin<sup>b</sup></b>        | 301.00     | <LOQ             | <LOQ            | <LOQ              | <LOQ              |
| <b>Quercetin 3-glucoside</b>        | 463.00     | 0.029 c ± 0.004  | 0.016 b ± 0.003 | 0.003 a ± 0.000   | 0.007 a ± 0.001   |
| <b>Myricetin</b>                    | 317.00     | 0.093 b ± 0.010  | 0.010 a ± 0.002 | 0.246 c ± 0.034   | 0.283 c ± 0.015   |
| <b>Total content EPP</b>            |            | 337.79 a ± 9.79  | 335.66 a ± 9.79 | 1195.97 c ± 14.28 | 515.82 b ± 2.65   |
| <b>Total content HPP</b>            |            | 1061.22 a ± 2.53 | 1082.9 a ± 6.52 | 1124.63 b ± 8.01  | 1175.87 c ± 17.42 |
| <b>Total dietary fiber</b>          |            | 33.3 c ± 6.6     | 48.0 d ± 4.3    | 10.1 a ± 0.1      | 15.7 b ± 0.4      |

Values followed by the same letters within each compound indicate no significant differences ( $p > 0.05$ ).

<sup>a</sup> nd means “not detectable”.

<sup>b</sup> <LOQ means “under the limits of detection”.
